# Supplementary material for: Heavy Metals of Santiago Island (Cape Verde) Alluvial Deposits: Baseline Value Maps and Human Health Risk Assessment
Source: PubMed Central journal article supplement (PMC6338986; doi:10.3390/ijerph16010002), 2018-12-20
Supplement: ijerph-16-00002-s001.pdf [file ijerph-16-00002-s001.pdf]

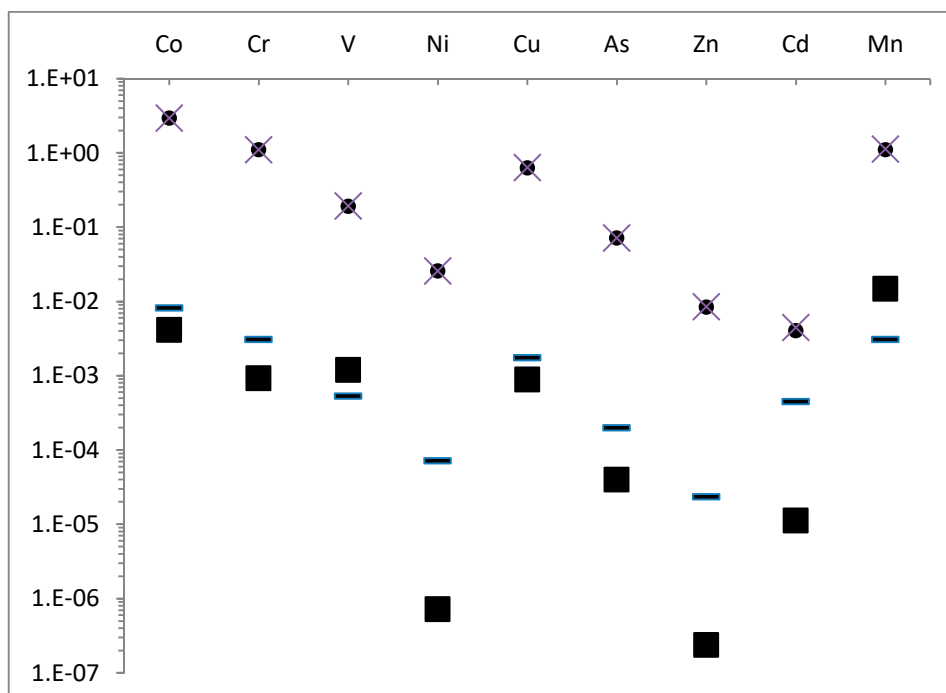

**Figure S1.** Hazard index (HI) and hazard quotient (HQ) for potentially toxic elements from Santiago Island. Symbols: HI-crosses; HQ for ingestion- balls; HQ for dermal contact – squares; HQ for inhalation-lines.

**Table S1.** Parameters of the theoretical models of spatial continuity fitted to the experimental variogram of As, Cd, Co, Cu, Cr, Hg, Mn, Ni, Pb, V, and Zn.

| ID | Model       | Main direction | C <sub>0</sub> | C <sub>1</sub> | Length | Anisotropy ratio | RMSE |
|----|-------------|----------------|----------------|----------------|--------|------------------|------|
| As | exponential | 90             | 0.1            | 0.19           | 8500   | 2.21             | 0.51 |
| Cd | exponential | 90             | 0.001          | 0.007          | 4000   | 1.45             | 0.16 |
| Co | exponential | 0              | 30             | 150            | 4000   | 1.27             | 2.38 |
| Cr | exponential | 45             | 2100           | 1900           | 2000   | 1.64             | 3.45 |
| Cu | exponential | 0              | 160            | 200            | 5000   | 1.22             | 1.05 |
| Hg | spherical   | 0              | 0.0001         | 0.0005         | 6000   | 2.03             | 0.02 |
| Mn | exponential | 90             | 90000          | 140000         | 5000   | 1.17             | 5.03 |
| Ni | exponential | 30             | 2600           | 2800           | 3500   | 1.83             | 4.82 |
| Pb | exponential | 45             | 18             | 50             | 4000   | 2.73             | 4.80 |
| V  | exponential | 0              | 1200           | 600            | 4000   | 1.98             | 3.56 |
| Zn | spherical   | 75             | 150            | 200            | 4000   | 1.01             | 4.57 |

ID: Variable; Model: theoretical model fitted to the experimental variogram; C<sub>0</sub> – nugget effect; C<sub>1</sub> – sill for the structure; Length – major range in meters; Anisotropy ratio: Geometrical Anisotropy = major axis/minor axis; RMSE: root-mean-square error.
